# Supplementary material for: Water-soluble SNS cationic palladium(II) complexes and their Suzuki–Miyaura cross-coupling reactions in aqueous medium
Source: publisher site journal article supplement (doi:10.3762/bjoc.14.160), 2018-07-23

**Supporting Information**

**for**

**Water-soluble SNS cationic palladium(II) complexes and  
their Suzuki–Miyaura cross-coupling reactions in aqueous  
medium**

Alphonse Fiebor<sup>1</sup>, Richard Tia<sup>2</sup>, Banothile C. E. Makhubela<sup>1\*</sup> and Henok H. Kinf<sup>1\*</sup>

Address: <sup>1</sup>Department of Chemistry, University of Johannesburg, PO Box 524,  
Auckland Park 2006, South Africa and <sup>2</sup>Department of Chemistry, Kwame Nkrumah  
University of Science and Technology, Kumasi, Ghana

Email: Banothile Makhubela - bmakhubela@uj.ac.za; Henok Kinf -

hhkinfe@uj.ac.za

\* Corresponding author

**NMR spectra**

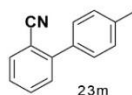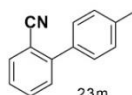

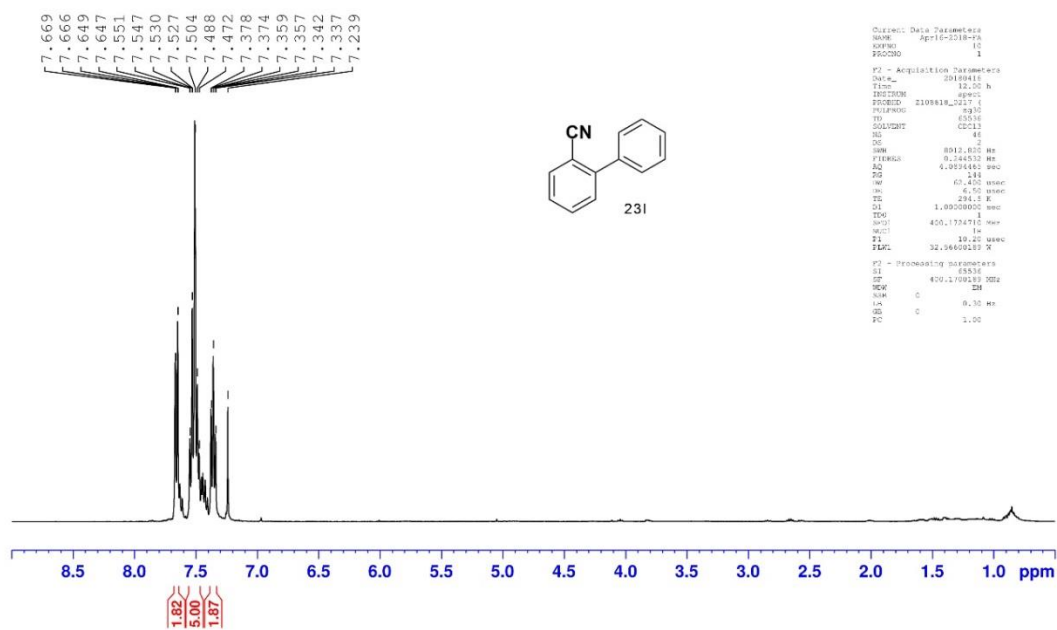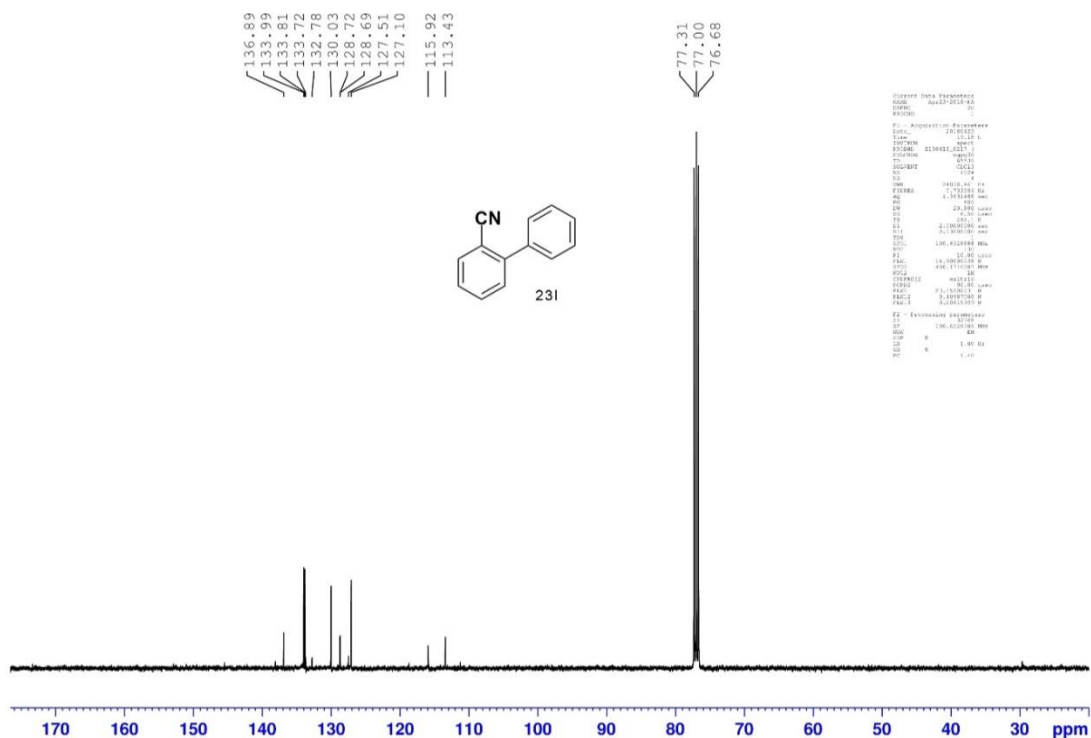

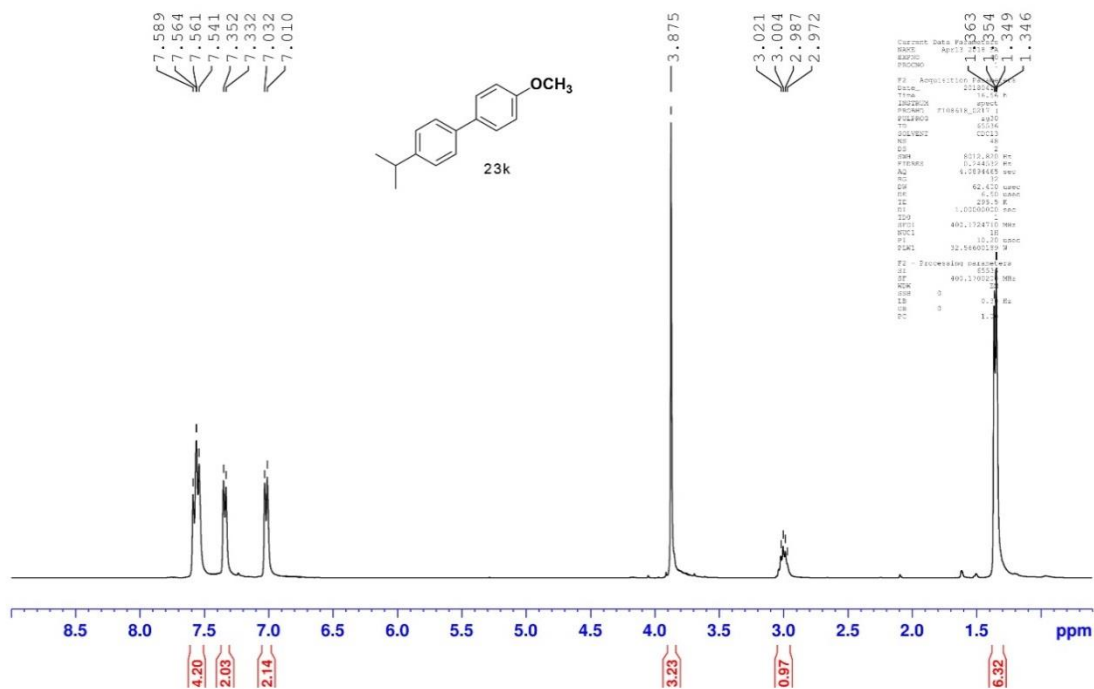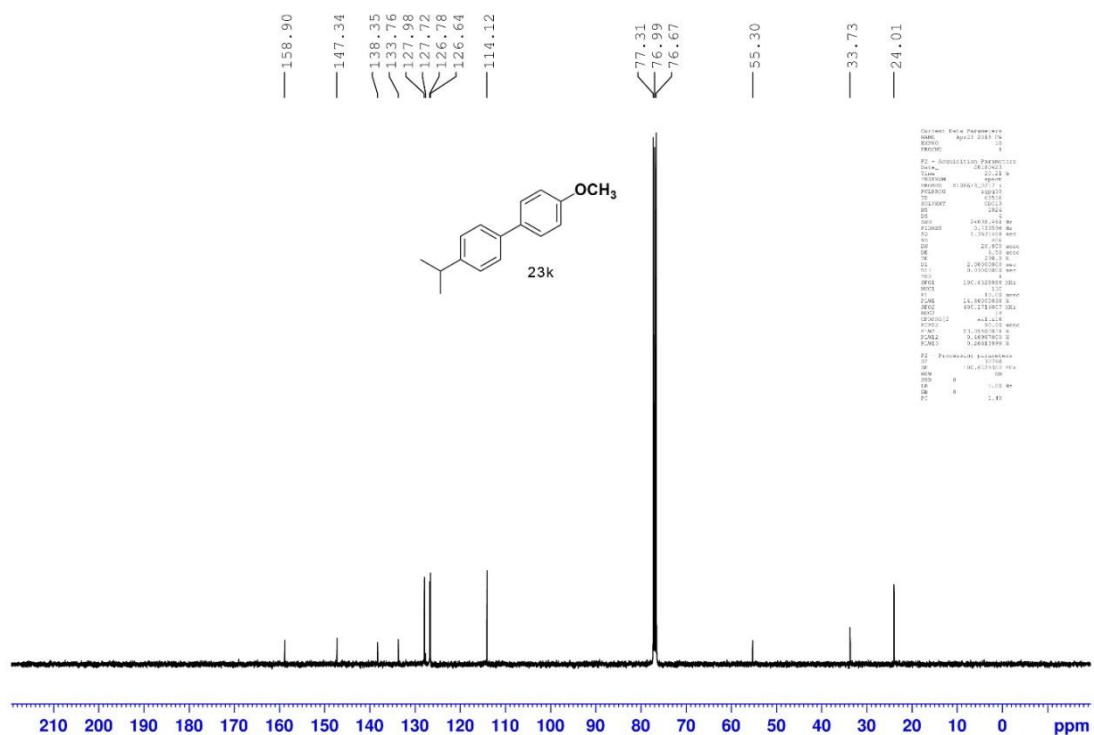

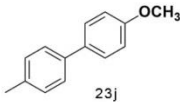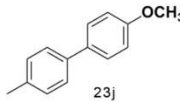

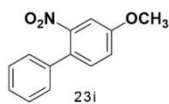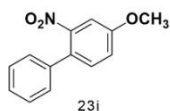

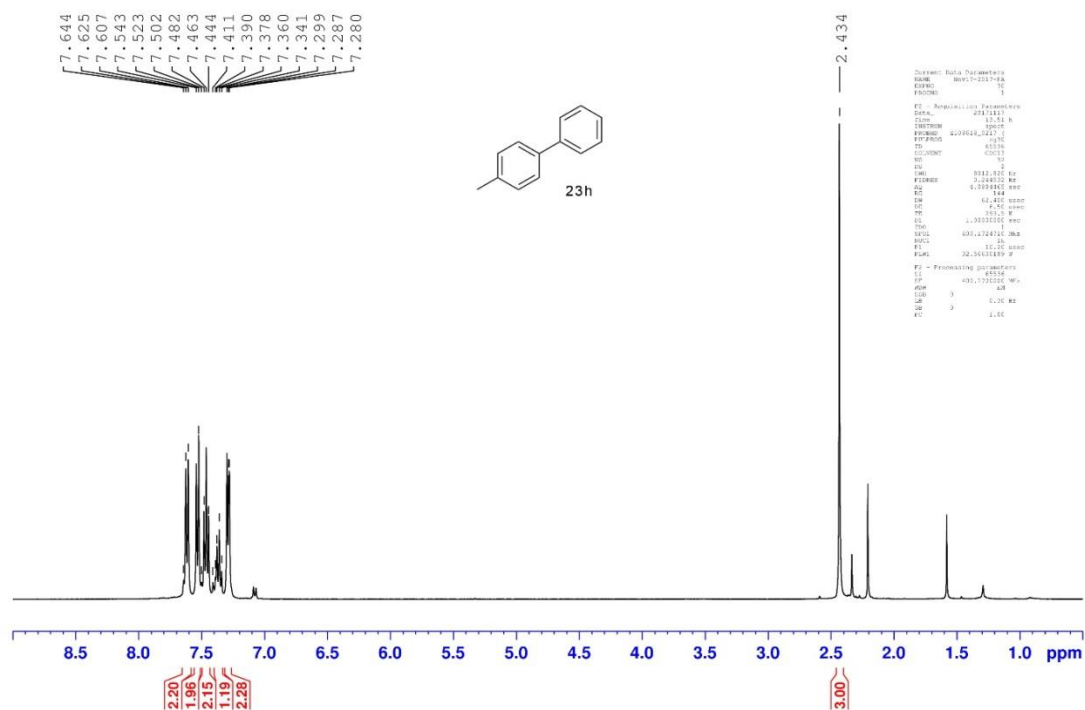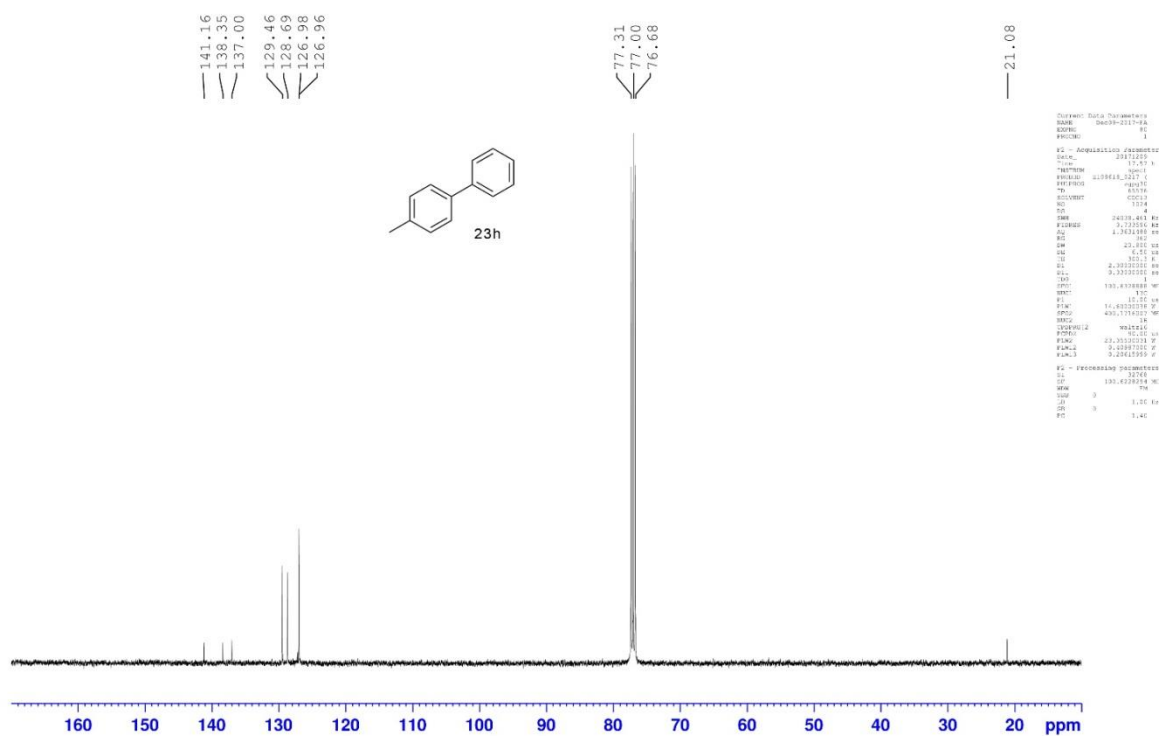

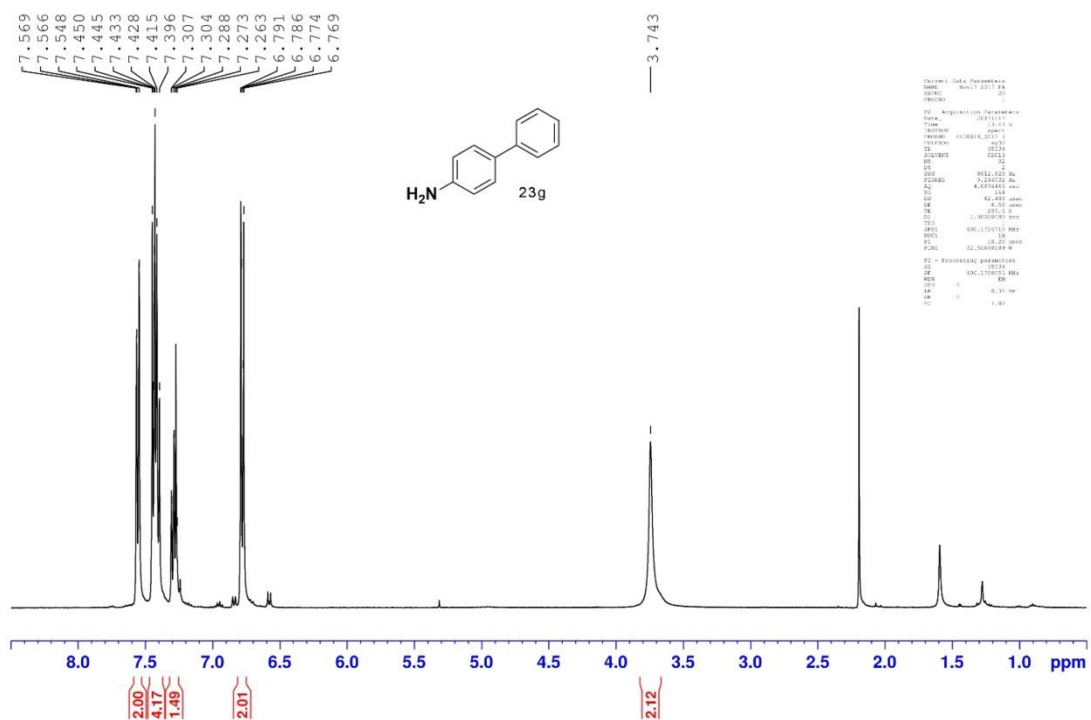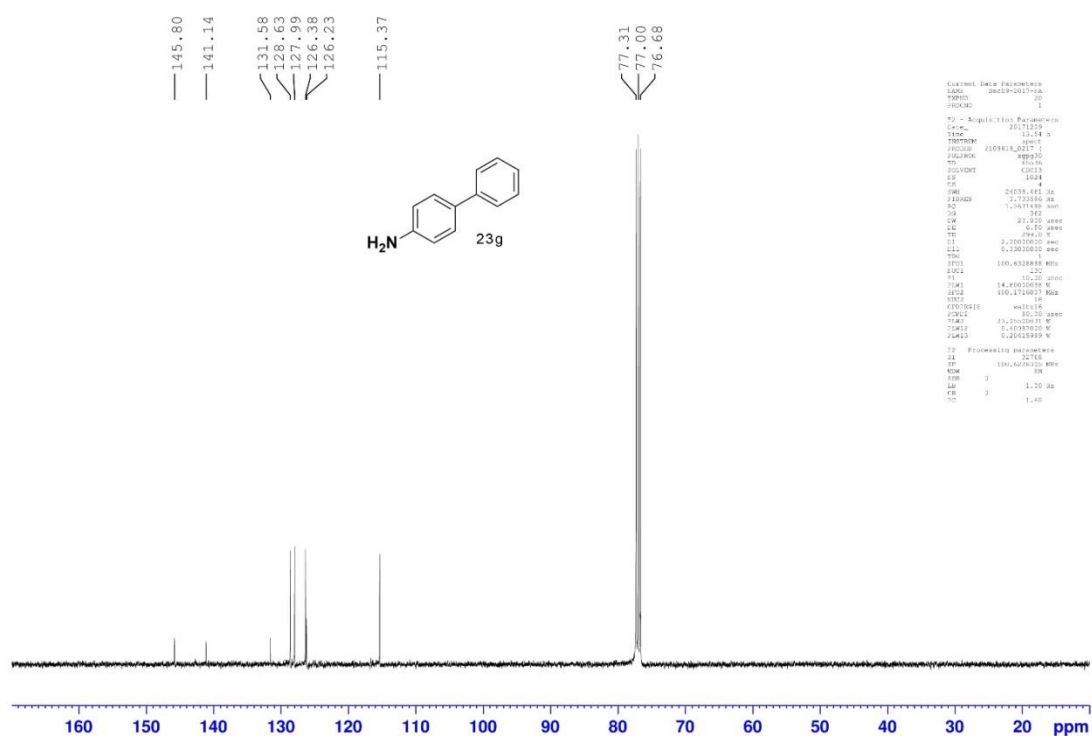





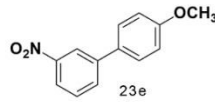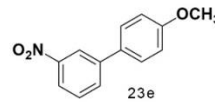

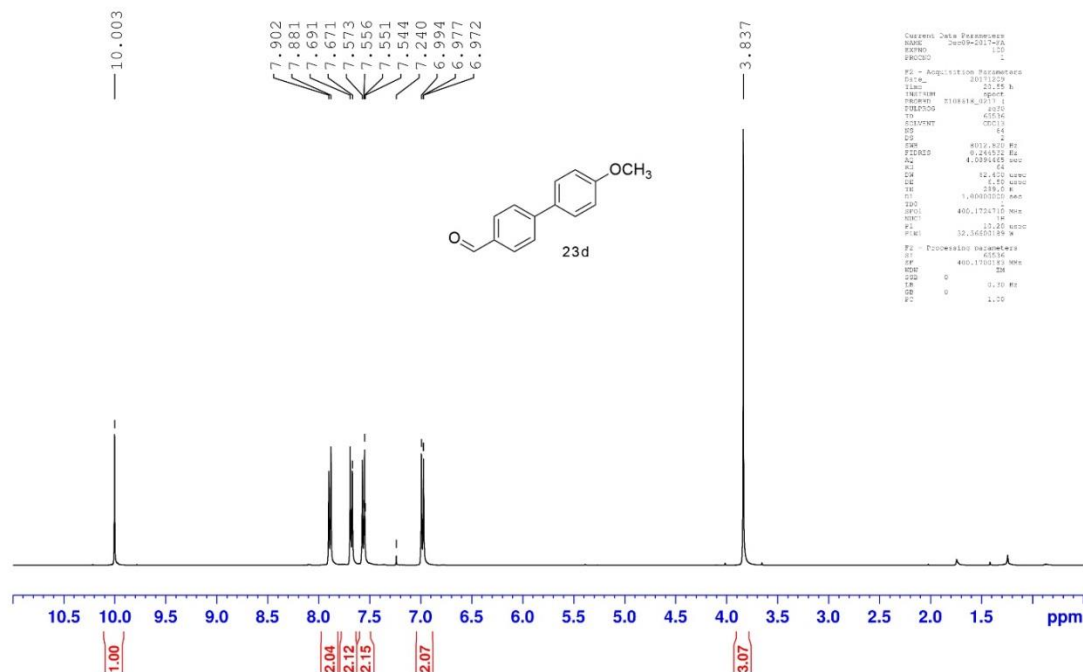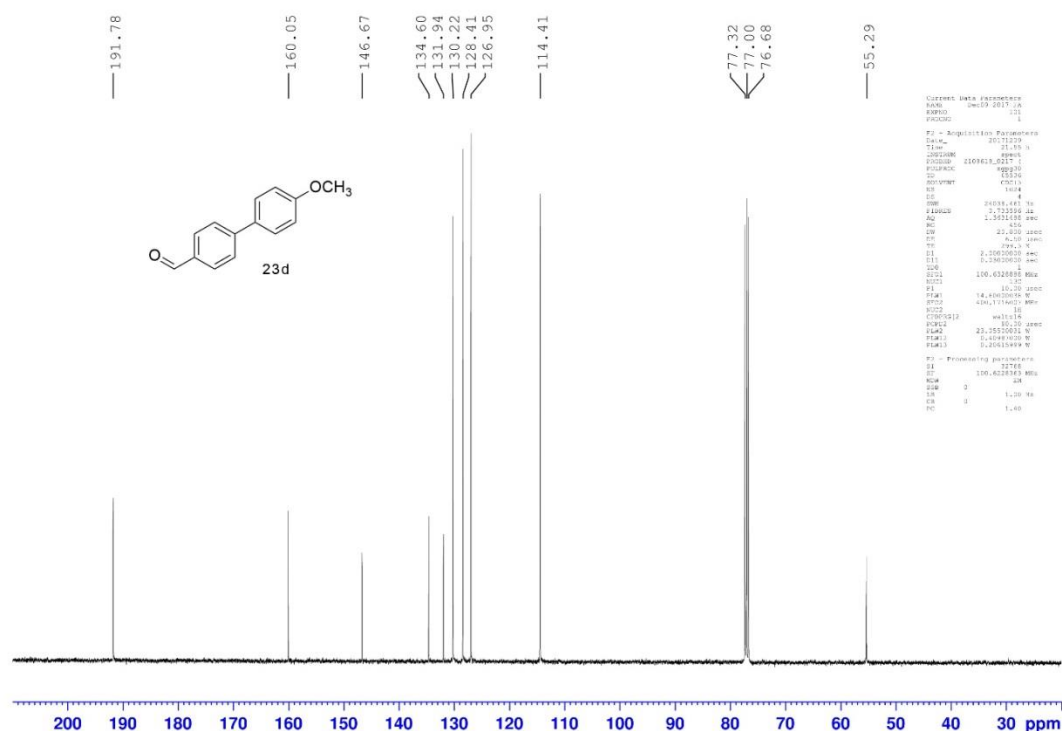

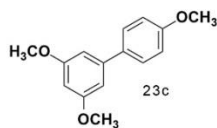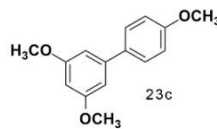

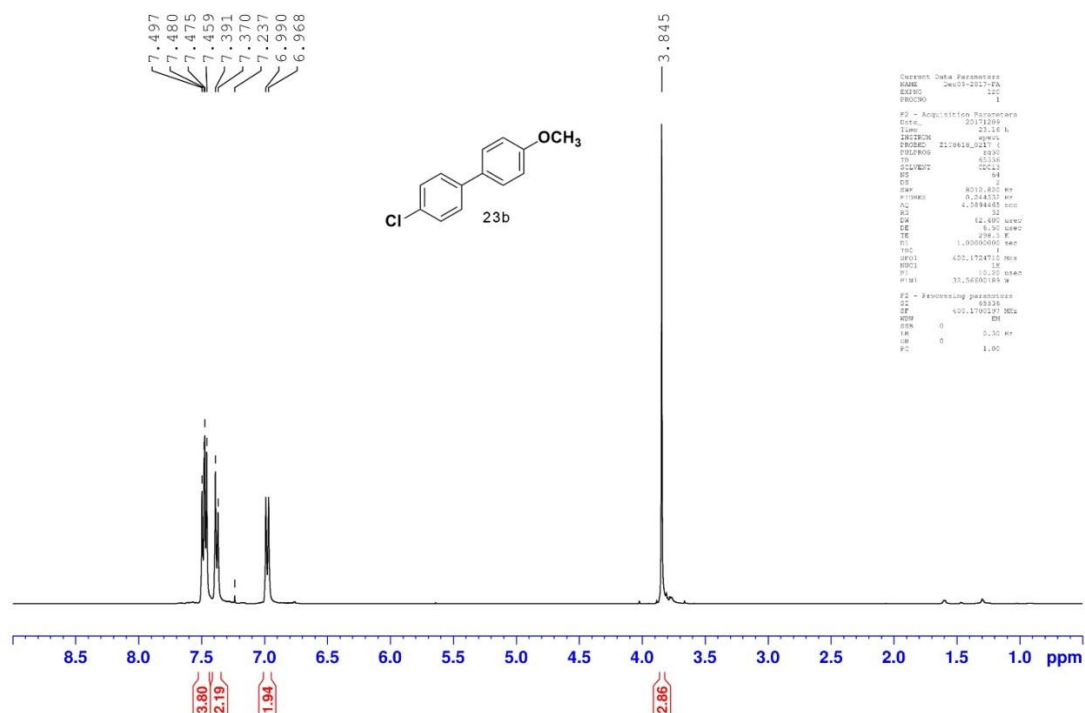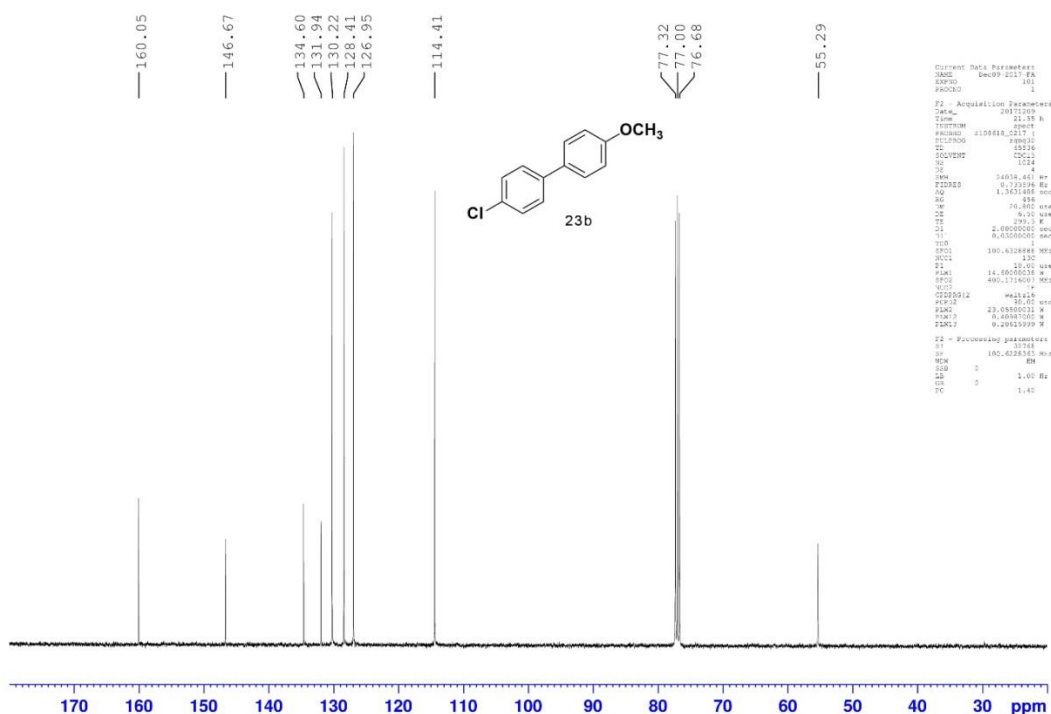

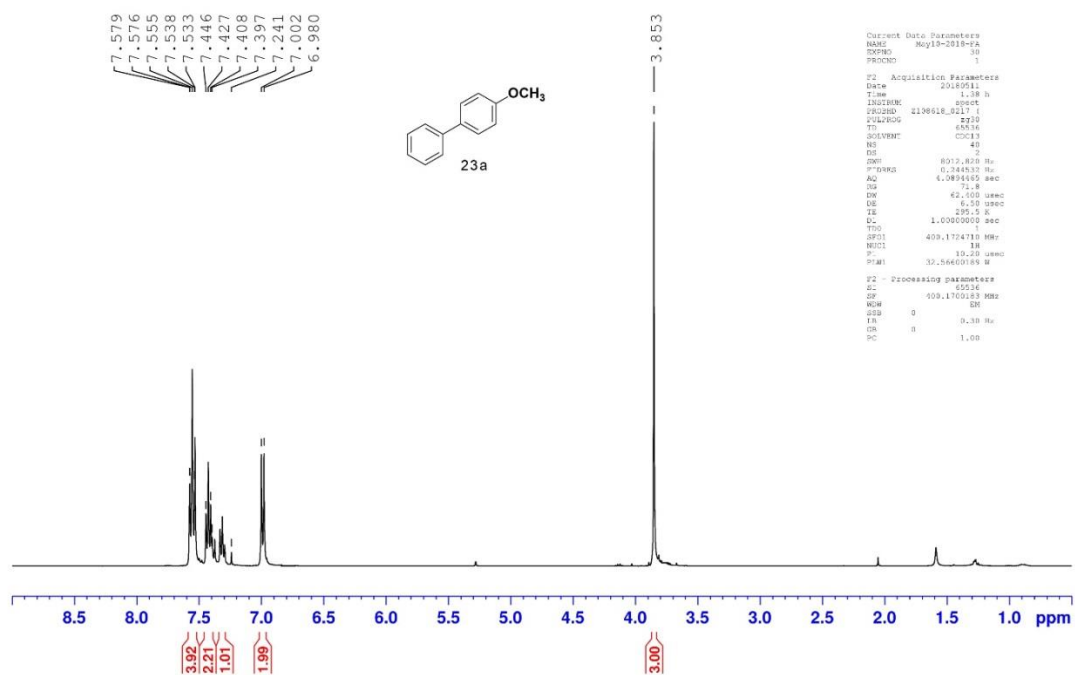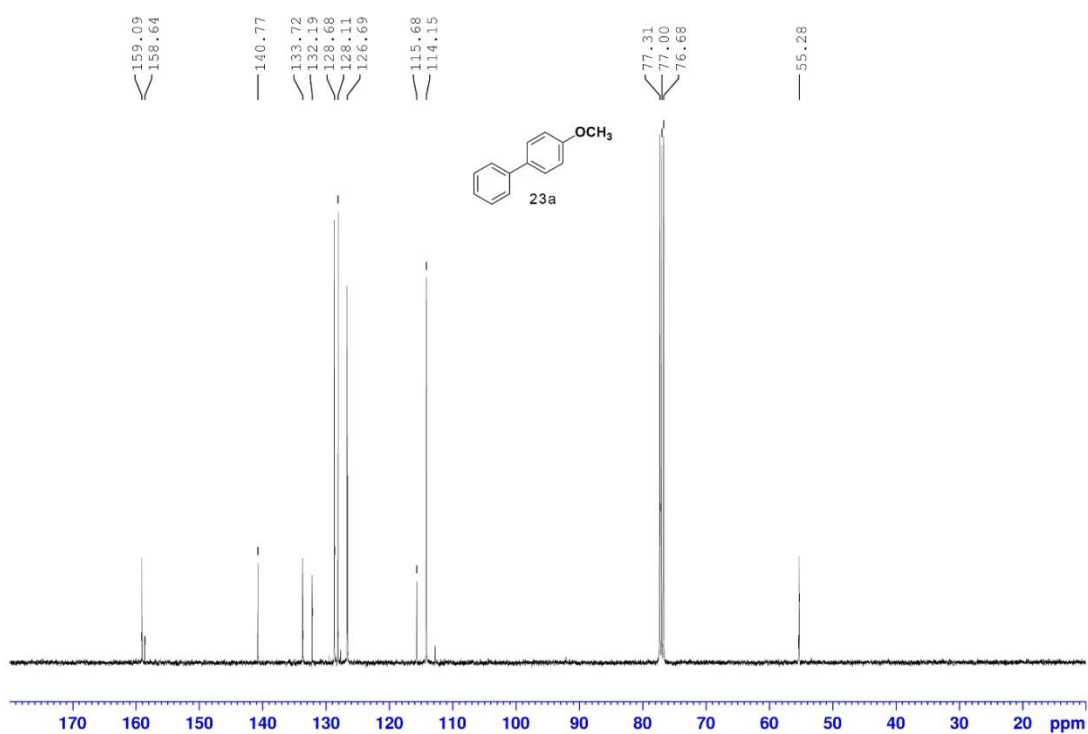



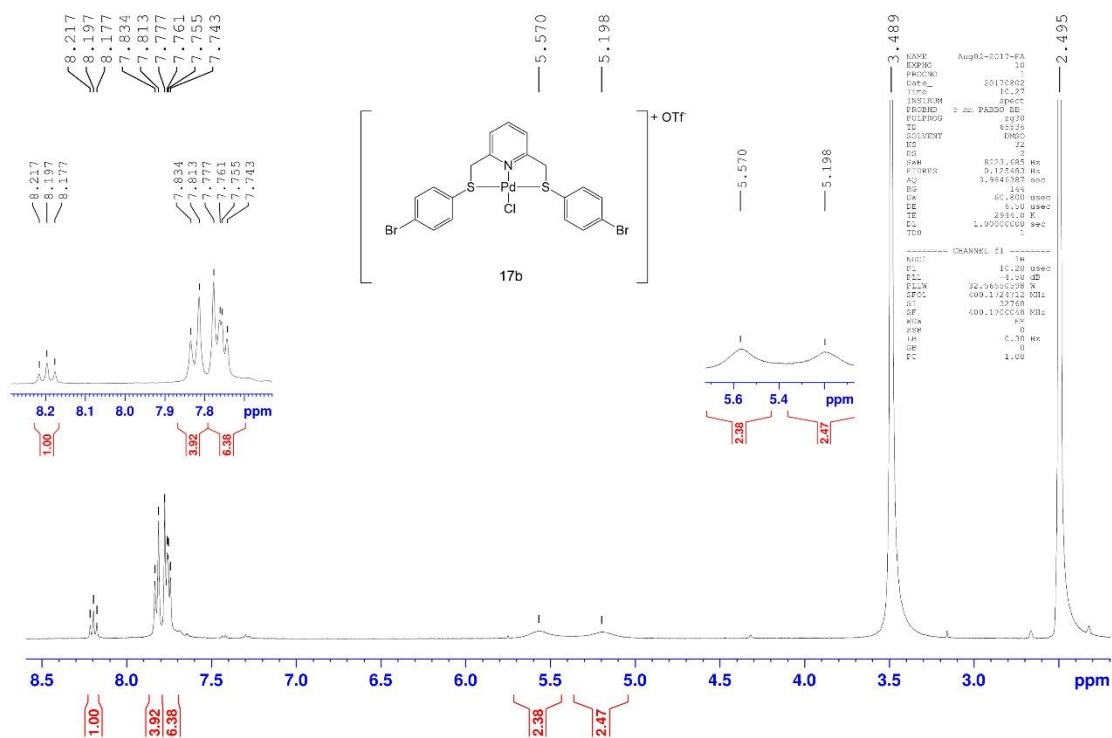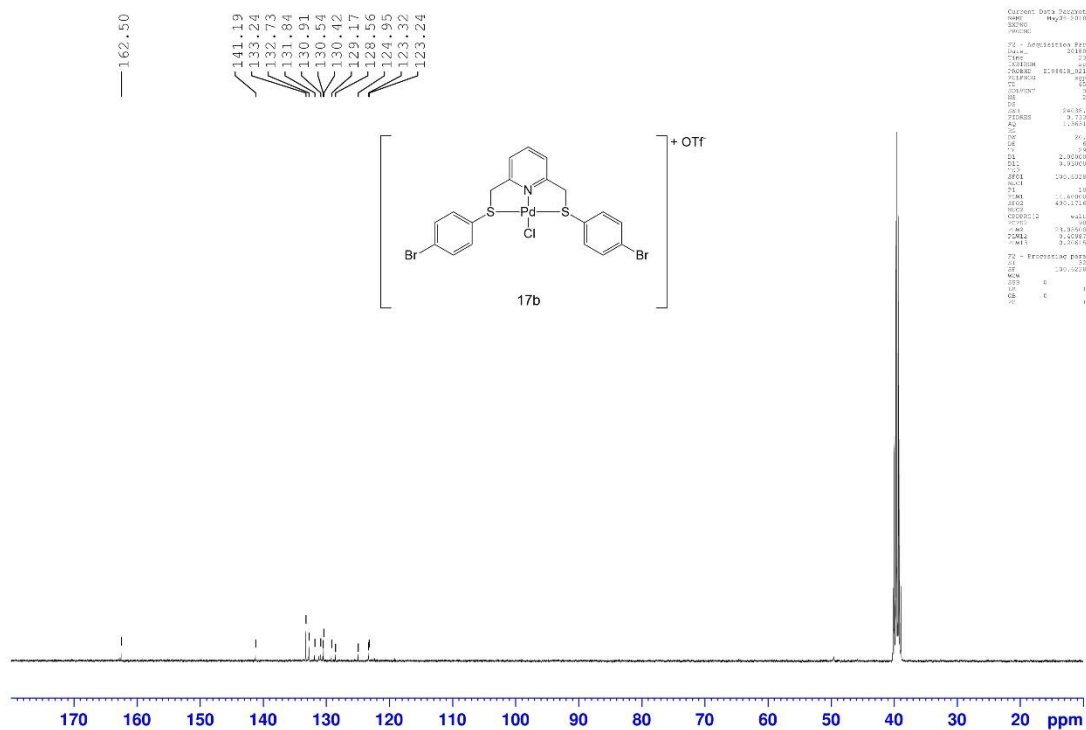



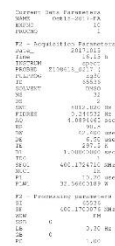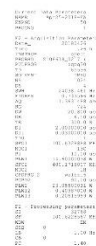

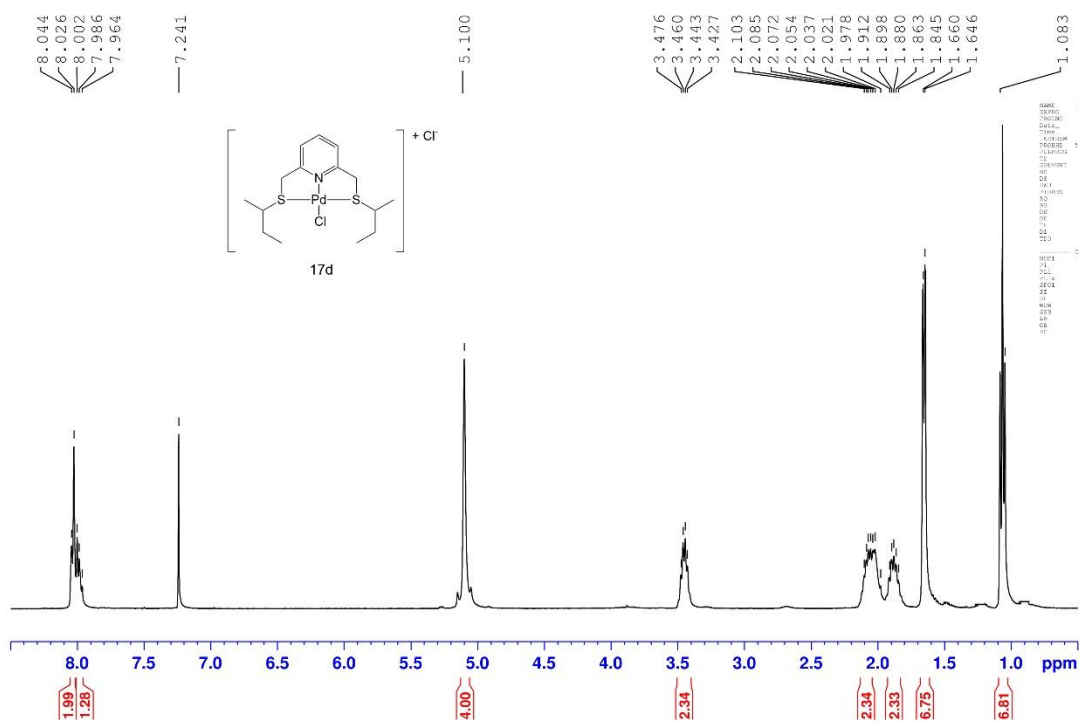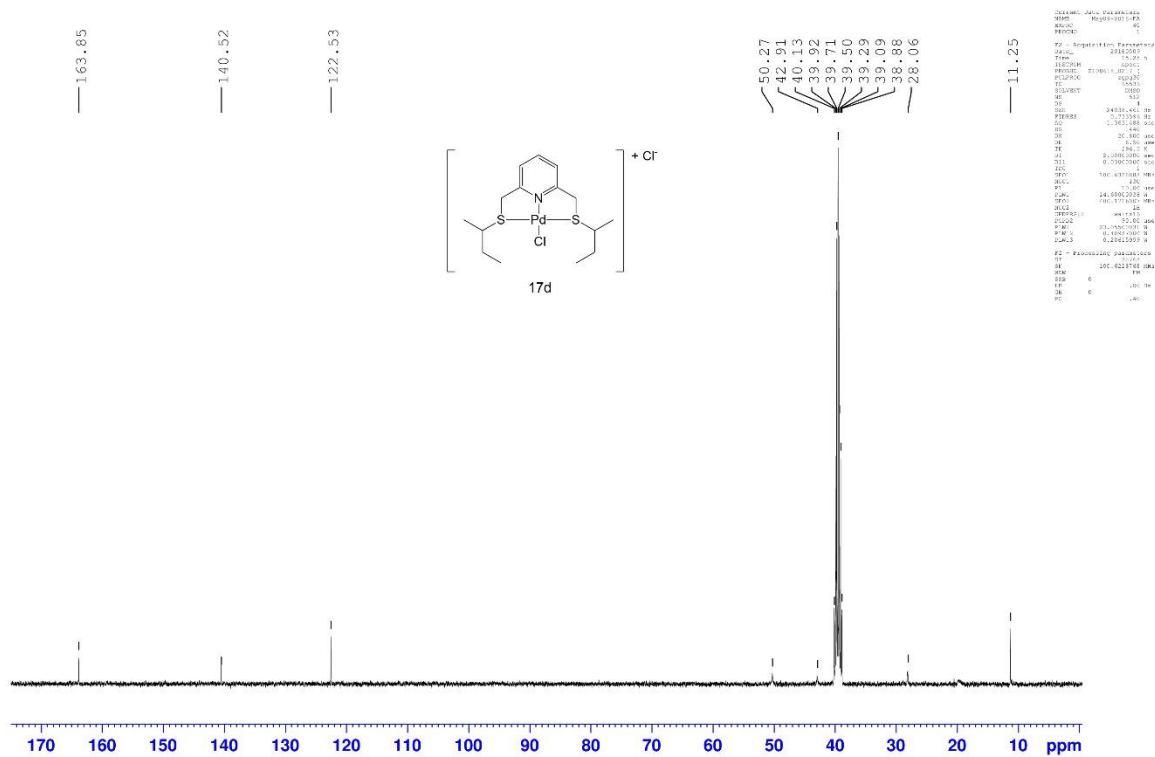

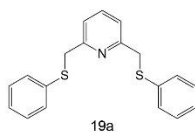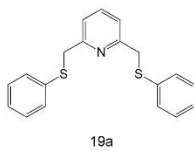

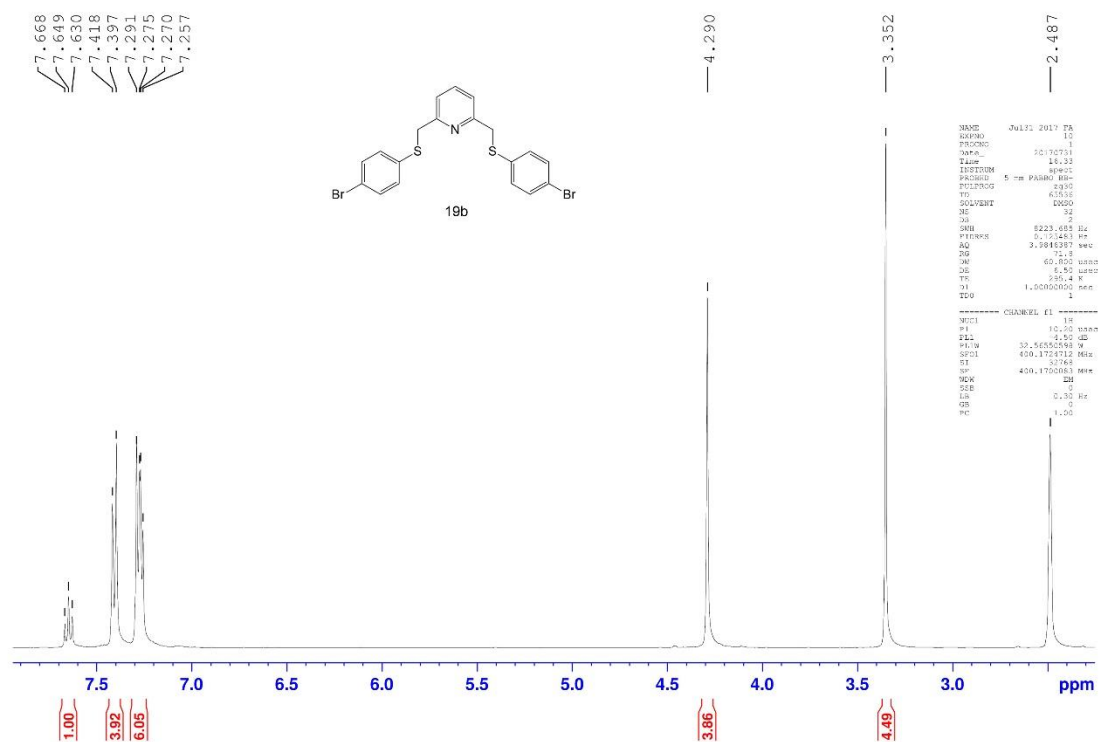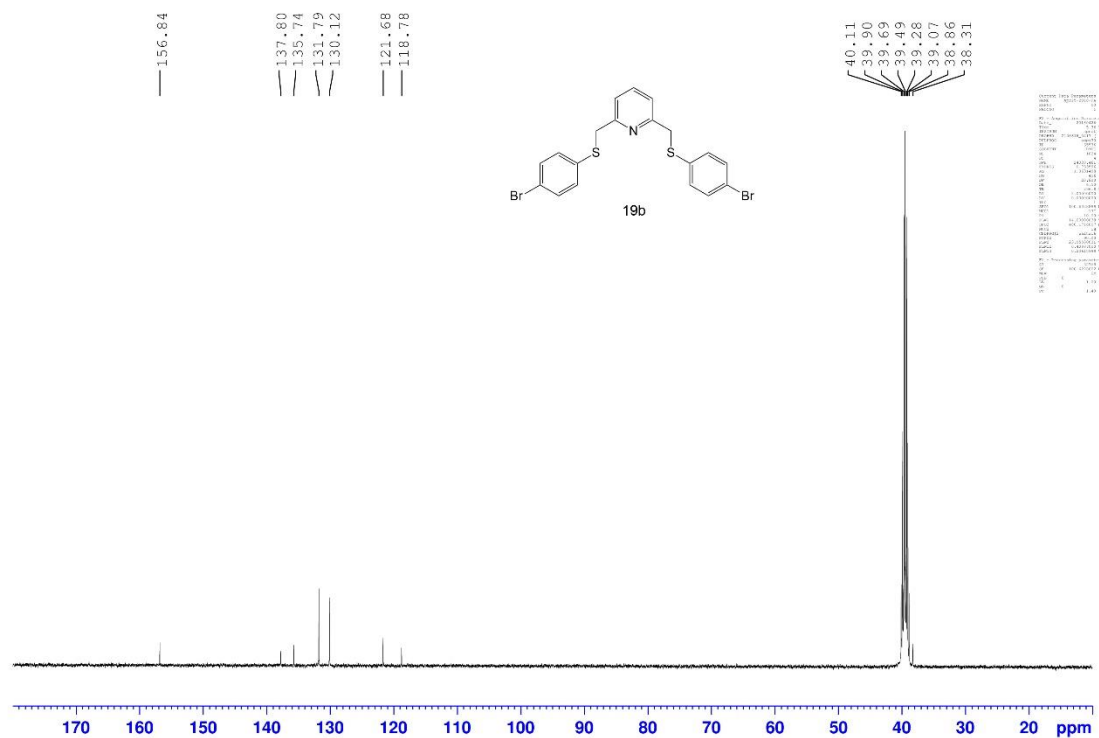

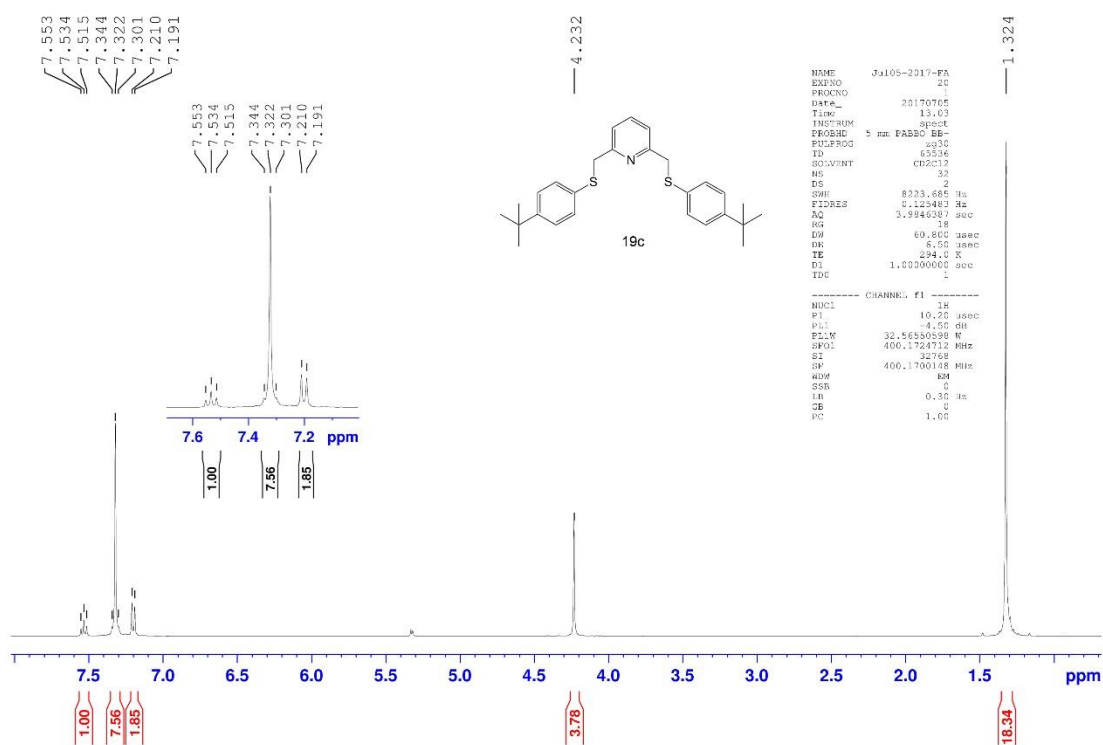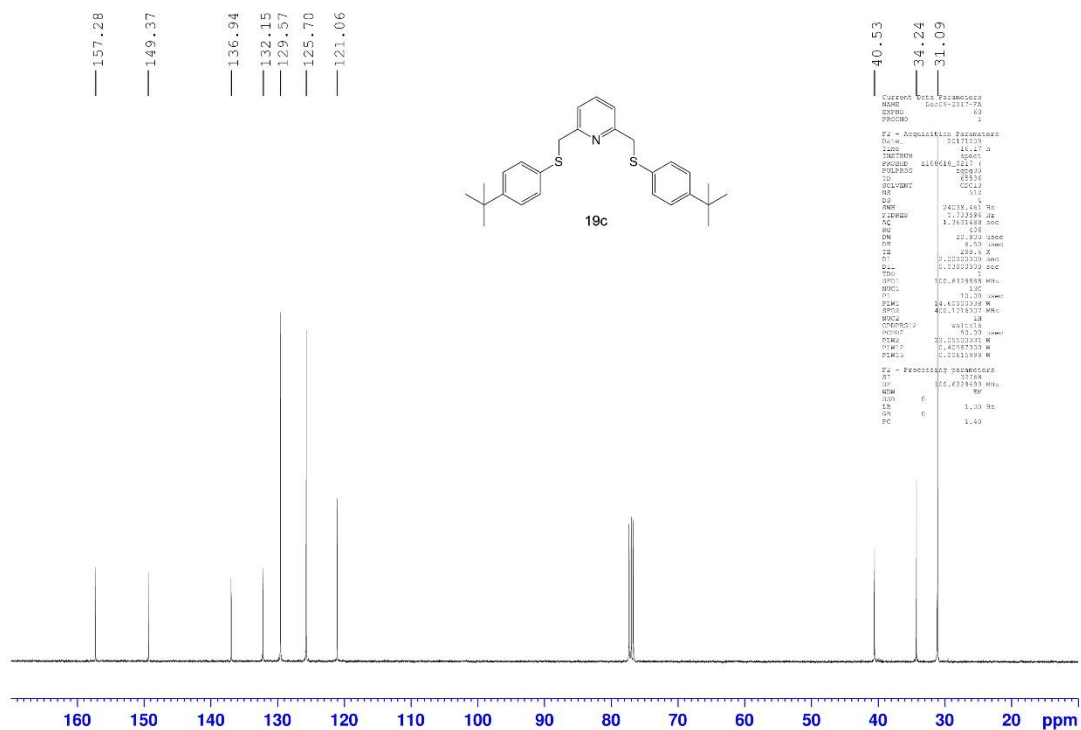

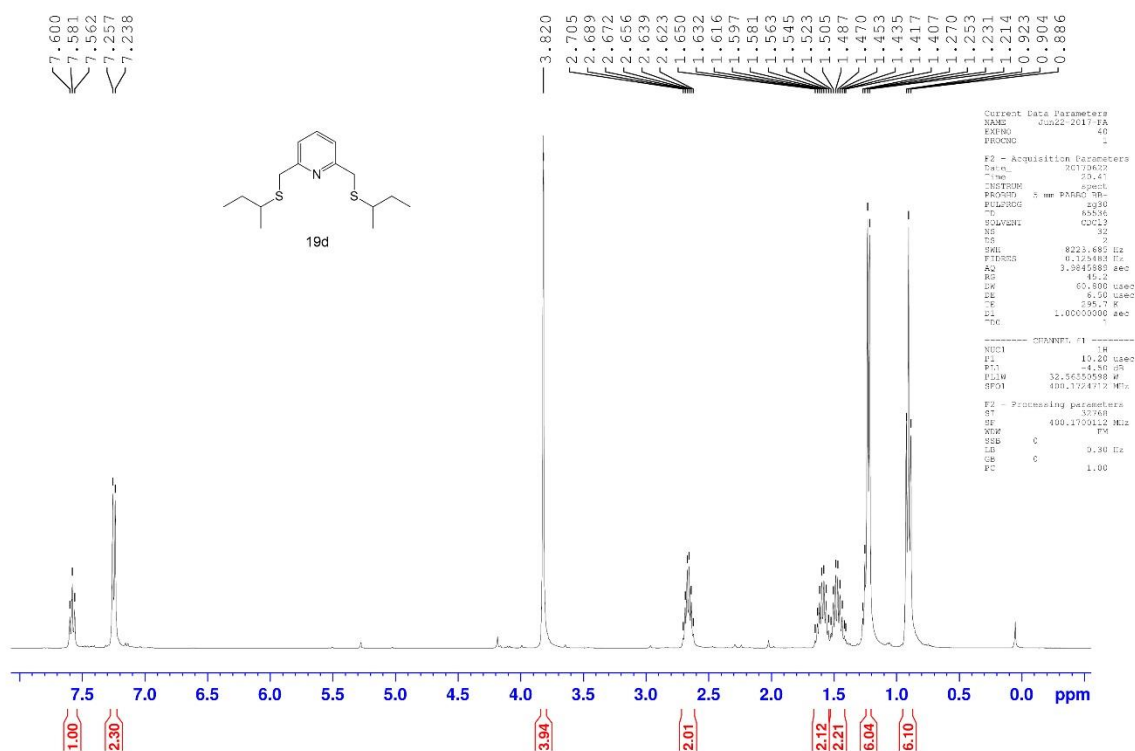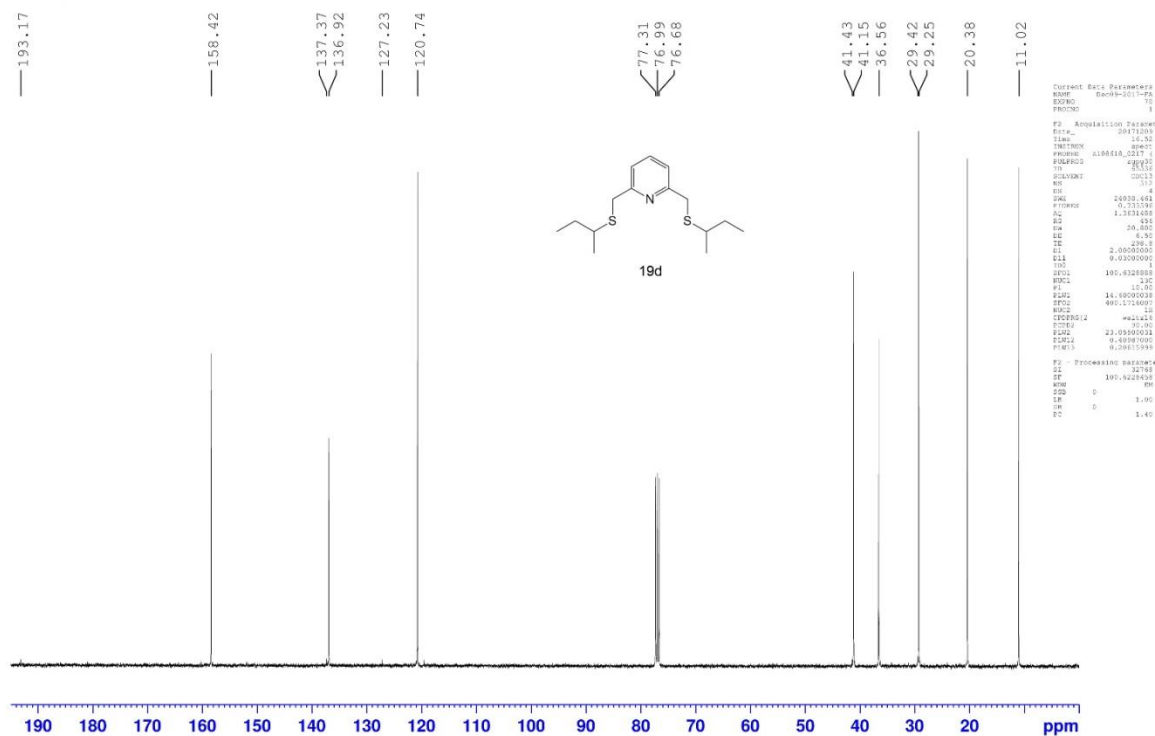

Supplement: Additional file 2 [file 1860-5397-14-160-S2.pdf]
